# Supplementary material for: Rotavirus Surveillance in Urban and Rural Areas of Niger, April 2010–March 2012
Source: PubMed Central journal article supplement (PMC3966376; doi:10.3201/eid2004.131328), 2014-04
Supplement: 13-1328-Techapp-s1.pdf [file 13-1328-Techapp-s1.pdf]

# Rotavirus Surveillance in Urban and Rural Areas of Niger, April 2010–March 2012

## Technical Appendix

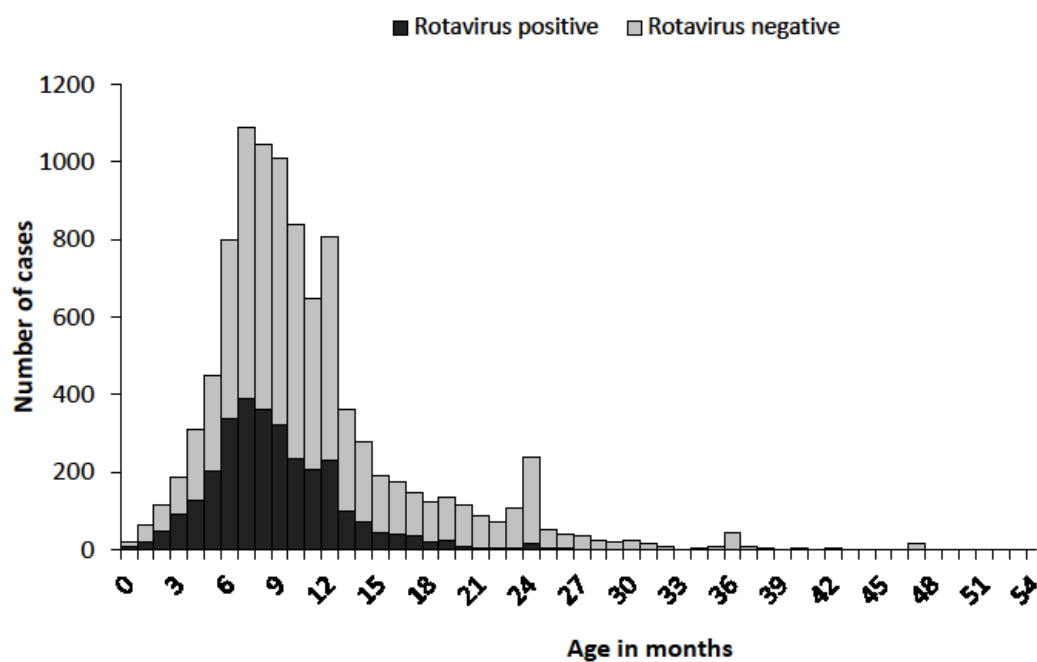

Technical Appendix Figure 1. Age distribution of rotavirus-positive and rotavirus-negative children in Niamey and Maradi region, Niger, April 2010–March 2012.

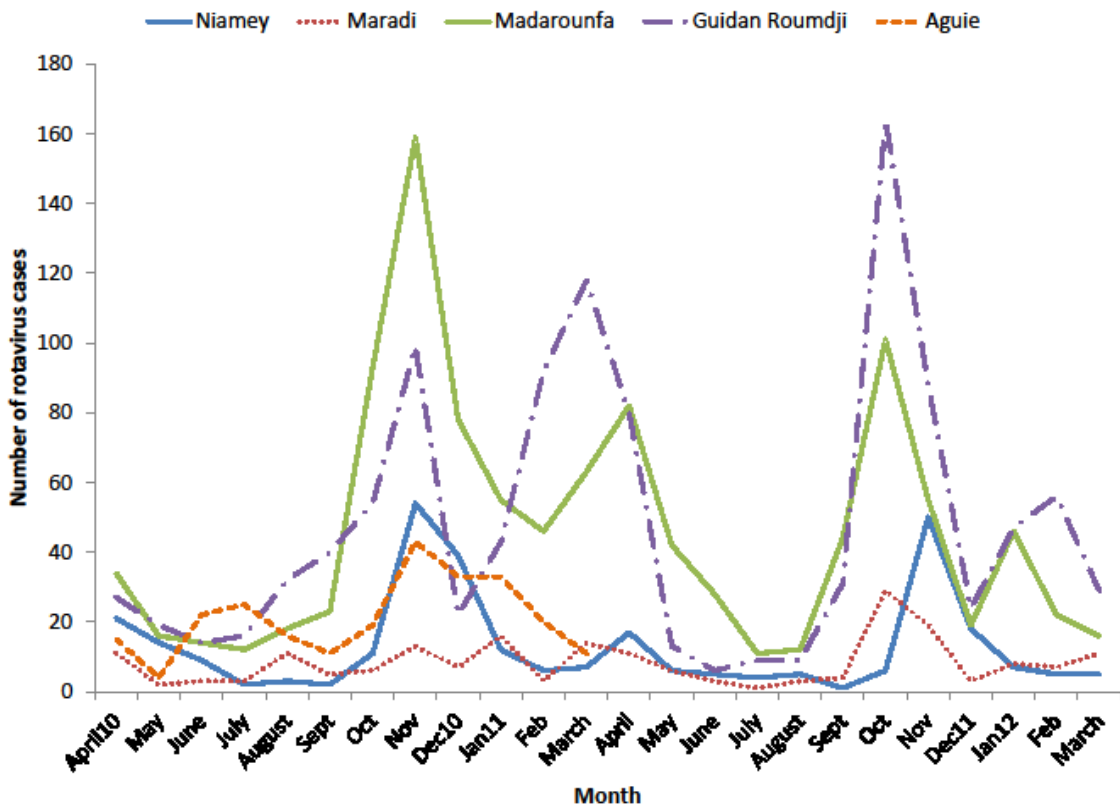

Technical Appendix Figure 2. Number of rotavirus cases per month in Niamey and Maradi region, Niger, April 2010–March 2012.
